# Supplementary material for: Fine Mapping of Virescent Leaf Gene v-1 in Cucumber (Cucumis sativus L.)
Source: PubMed Central journal article supplement (PMC5085635; doi:10.3390/ijms17101602), 2016-09-22
Supplement: ijms-17-01602-s001.pdf [file ijms-17-01602-s001.pdf]

# Supplementary Materials: Fine Mapping of Virescent Leaf Gene *v-1* in Cucumber (*Cucumis sativus* L.)

Han Miao, Shengping Zhang, Min Wang, Ye Wang, Yiqun Weng and Xingfang Gu

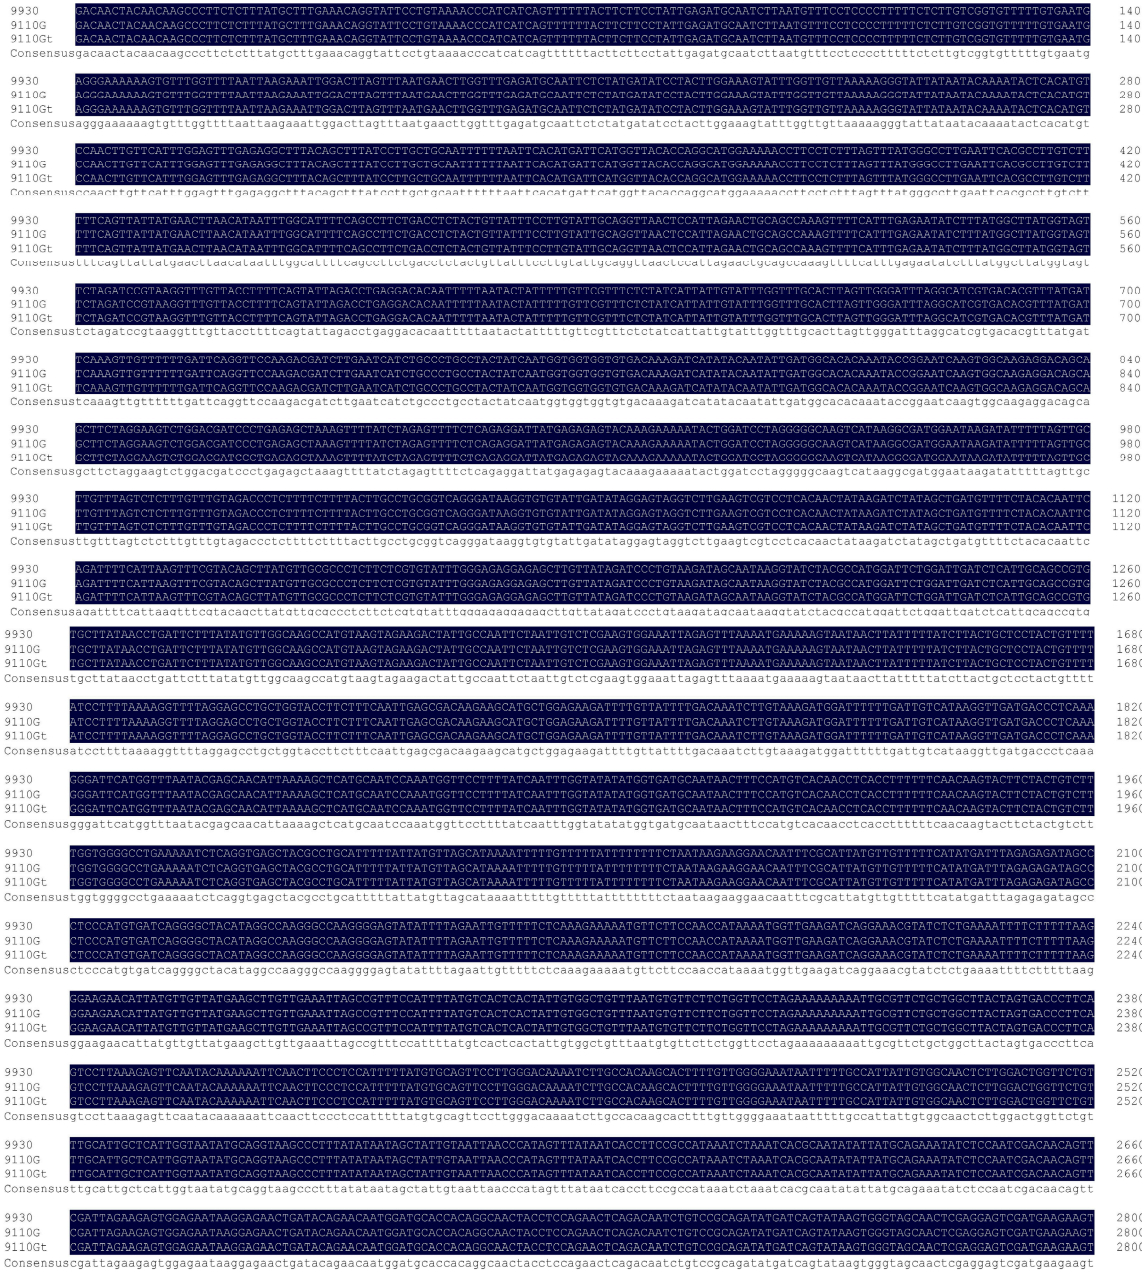

Figure S1. Cont.

9930 **CGTCTGAGAGGCTCCCTTGGATCTCGGAGAGATATAAAGCTCACCCTTGCCCTTGACCTCGTTCGAAGGTAATTTACATATAAATTCATGACATATGGTACGGAGGAGCAGTCTTGGAAATGACTGCTCA** 2940  
9110G **CGTCTGAGAGGCTCCCTTGGATCTCGGAGAGATATAAAGCTCACCCTTGCCCTTGACCTCGTTCGAAGGTAATTTACATATAAATTCATGACATATGGTACGGAGGAGCAGTCTTGGAAATGACTGCTCA** 2940  
9110Gt **CGTCTGAGAGGCTCCCTTGGATCTCGGAGAGATATAAAGCTCACCCTTGCCCTTGACCTCGTTCGAAGGTAATTTACATATAAATTCATGACATATGGTACGGAGGAGCAGTCTTGGAAATGACTGCTCA** 2940  
Consensus **cgctgtgagaagctcccttggatctcggagagatataaagctcaccttggccttgacctgttogaaggtaaatttcacatataaatttgcatgacatatggatcgggagcaggtgttggaaatgactgctca**

9930 **CGAATTACAATTTGCGCAAATTAACCGGATTCATCTCTGTGCACCCCTCTTGATCTTTGACGGTCCATTTGATCAAAATGGATGAAGAATGCTAGATGCAATATGTGAGAGACTTAACCCCGTTTGAGCACA** 3080  
9110G **CGAATTACAATTTGCGCAAATTAACCGGATTCATCTCTGTGCACCCCTCTTGATCTTTGACGGTCCATTTGATCAAAATGGATGAAGAATGCTAGATGCAATATGTGAGAGACTTAACCCCGTTTGAGCACA** 3080  
9110Gt **CGAATTACAATTTGCGCAAATTAACCGGATTCATCTCTGTGCACCCCTCTTGATCTTTGACGGTCCATTTGATCAAAATGGATGAAGAATGCTAGATGCAATATGTGAGAGACTTAACCCCGTTTGAGCACA** 3080  
Consensus **cgcaattacaatttgcgcaaattaaccggatctcatctctgtgacccctcttgatctttgacggttccattgttgatcaaatggatgaaagaatgctagatgcaaatgtgagagacttaaccctgttgagcaca**

9930 **TAAGGACATTTTCTTCGAGAAAGGTCACCTCTCAGCAAAATGATTATCAAAATGAGGTCATTTCACTCAATCAACCACTAAGCAACCACTAAGCGGTCGAGATGGGTTTTTCAATCTCCCTGATTCGCGGCTATTTC** 3270  
9110G **TAAGGACATTTTCTTCGAGAAAGGTCACCTCTCAGCAAAATGATTATCAAAATGAGGTCATTTCACTCAATCAACCACTAAGCAACCACTAAGCGGTCGAGATGGGTTTTTCAATCTCCCTGATTCGCGGCTATTTC** 3270  
9110Gt **TAAGGACATTTTCTTCGAGAAAGGTCACCTCTCAGCAAAATGATTATCAAAATGAGGTCATTTCACTCAATCAACCACTAAGCAACCACTAAGCGGTCGAGATGGGTTTTTCAATCTCCCTGATTCGCGGCTATTTC** 3270  
Consensus **taaggacatTTTCTTCGAGAAAGGTCACCTCTCAGCAAAATGATTATCAAAATGAGGTCATTTCACTCAATCAACCACTAAGCAACCACTAAGCGGTCGAGATGGGTTTTTCAATCTCCCTGATTCGCGGCTATTTC**

9930 **TGGTGAGGAGCTGCTGACTTGGGCTCTTGACCCCTGTCGCAAGCGTTTGGCTTCGGCTCTTCAACTCGCACGGTCAAAGCCATCTCCGAGGTAGAAGCATTTCCTCATAGCCGAGGACTTGAAGTTTGTATCCCTCCAGT** 3360  
9110G **TGGTGAGGAGCTGCTGACTTGGGCTCTTGACCCCTGTCGCAAGCGTTTGGCTTCGGCTCTTCAACTCGCACGGTCAAAGCCATCTCCGAGGTAGAAGCATTTCCTCATAGCCGAGGACTTGAAGTTTGTATCCCTCCAGT** 3360  
9110Gt **TGGTGAGGAGCTGCTGACTTGGGCTCTTGACCCCTGTCGCAAGCGTTTGGCTTCGGCTCTTCAACTCGCACGGTCAAAGCCATCTCCGAGGTAGAAGCATTTCCTCATAGCCGAGGACTTGAAGTTTGTATCCCTCCAGT** 3360  
Consensus **tggtagagctgctgacttgggctcttgaccctctgccaagcgttggcttccgctcttcaactcgcacggtcAAAGCCATCTCCGAGGTAGAAGCATTTCCTCATAGCCGAGGACTTGAAGTTTGTATCCCTCCAGT**

9930 **TACAGAGCTCCACAGAAACAAC TAAGACACAAGTTTCGATTCTACTCGCATCAATGGCGAACATGGGCTGCATGCTTTGTTCAAGCAGCATGGCGAAGATATAAGAGACGGAAGAGCGAGCTGAATCAGGGCTAAA** 3500  
9110G **TACAGAGCTCCACAGAAACAAC TAAGACACAAGTTTCGATTCTACTCGCATCAATGGCGAACATGGGCTGCATGCTTTGTTCAAGCAGCATGGCGAAGATATAAGAGACGGAAGAGCGAGCTGAATCAGGGCTAAA** 3500  
9110Gt **TACAGAGCTCCACAGAAACAAC TAAGACACAAGTTTCGATTCTACTCGCATCAATGGCGAACATGGGCTGCATGCTTTGTTCAAGCAGCATGGCGAAGATATAAGAGACGGAAGAGCGAGCTGAATCAGGGCTAAA** 3500  
Consensus **tcaagagctccacagaaacaactaagacacaagtttcgattctactcgcataatggcgaacatgggctgcattgcttttcaagcagcatggcgaagatataagagacggaagagcgaactgaatcagggctaaa**

9930 **SAGAGTTATCCAACTACCAAACTCGAGTCCCCGCTTTACCCACCAACGACATCAAATTTGGATTACAGTACAGGAATGCTAGAAGGGCATTGAATAAGCGTTGTGTTTCAGATGCTGGGGTCTTAAGCTCATTGCAGAA** 3640  
9110G **SAGAGTTATCCAACTACCAAACTCGAGTCCCCGCTTTACCCACCAACGACATCAAATTTGGATTACAGTACAGGAATGCTAGAAGGGCATTGAATAAGCGTTGTGTTTCAGATGCTGGGGTCTTAAGCTCATTGCAGAA** 3640  
9110Gt **SAGAGTTATCCAACTACCAAACTCGAGTCCCCGCTTTACCCACCAACGACATCAAATTTGGATTACAGTACAGGAATGCTAGAAGGGCATTGAATAAGCGTTGTGTTTCAGATGCTGGGGTCTTAAGCTCATTGCAGAA** 3640  
Consensus **agagattatccaaactaccaaaactcgagtccccgctttaccaccaacgacatcaaatTTGGATTACAGTACAGGAATGCTAGAAGGGCATTGAATAAGCGTTGTGTTTCAGATGCTGGGGTCTTAAGCTCATTGCAGAA**

9930 **CCCAGAGAAGCTGACTTCCCAATTTGAGGAGTAAGTGACGATGGAGCTCGGCTGAAAAACGCAACTGAGTCTGTACAGGTGGGTTGAAACGGTGAAGCTATACCTACTACTGGTTGTTTGTGTAATAAGAAA** 3700  
9110G **CCCAGAGAAGCTGACTTCCCAATTTGAGGAGTAAGTGACGATGGAGCTCGGCTGAAAAACGCAACTGAGTCTGTACAGGTGGGTTGAAACGGTGAAGCTATACCTACTACTGGTTGTTTGTGTAATAAGAAA** 3700  
9110Gt **CCCAGAGAAGCTGACTTCCCAATTTGAGGAGTAAGTGACGATGGAGCTCGGCTGAAAAACGCAACTGAGTCTGTACAGGTGGGTTGAAACGGTGAAGCTATACCTACTACTGGTTGTTTGTGTAATAAGAAA** 3700  
Consensus **cccagagaagctgacttcccaatTTGAGGAGTAAGTGACGATGGAGCTCGGCTGAAAAACGCAACTGAGTCTGTACAGGTGGGTTGAAACGGTGAAGCTATACCTACTACTGGTTGTTTGTGTAATAAGAAA**

9930 **TTTTGGTTAAGAAAATTTACGTGGGATTTTC** 3813  
9110G **TTTTGGTTAAGAAAATTTACGTGGGATTTTC** 3813  
9110Gt **TTTTGGTTAAGAAAATTTACGTGGGATTTTC** 3813  
Consensus **tttggTTAAGAAAATTTacgtgggatTTTC**

Figure S1. *CsaCNGs* DNA sequence from 3 cucumbers as follow. 9930, 9110G and 9110Gt.

**Table S1.** Information of molecular makers used in fine mapping of *v-1* in this study.

| #  | Marker   | Marker Types | 9930 Scaffold  | Position | Chr. | Forward Primer (5'-3')    | Reverse Primer (5'-3') | Enzyme  |
|----|----------|--------------|----------------|----------|------|---------------------------|------------------------|---------|
| 1  | UW081313 | SSR          | scaffold000066 | 166409   | 6    | CACGTGTGTTTCACAACCTTCTT   | TTATCGACCAATTGCCAACA   |         |
| 2  | UW081309 | SSR          | scaffold000066 | 170584   | 6    | TTTGAAATAGCAACCTATGAGC    | GAACCCAATAATGCCAAAGA   |         |
| 3  | v1dCAPs1 | dCAPs        | scaffold000066 | 194393   | 6    | TGCAAAGTTTGTTCATTTGA      | GGGGCATTAAAGTTTGCTTGA  | HaeIII  |
| 4  | SSR18405 | SSR          | scaffold000066 | 206319   | 6    | CGCAGGTGCATCTCATGTAA      | GACAAACAAGGGGACGAAAA   |         |
| 5  | v1SSR8   | SSR          | scaffold000066 | 249054   | 6    | GGCAATGGTAAAGGTTGGAA      | AAGGGATGTGTGGTGTGGTT   |         |
| 6  | v1CAPs15 | CAPS         | scaffold000066 | 299463   | 6    | ATCTCACTTTCATCTATTTATTGAC | TTGGCCAGAACTTTGTAGCA   | MaeII   |
| 7  | v1InDel1 | InDel        | scaffold000066 | 330800   | 6    | GAGATACATGAAAATTAGCAA     | TGTGATGTCCATGATGAGATTG |         |
| 8  | v1CAPs20 | CAPS         | scaffold000066 | 340002   | 6    | GTATAATGAGAAAATAAATATGA   | CCAATTCAAACATGCTCATTG  | SspI    |
| 9  | v1CAPs23 | CAPS         | scaffold000066 | 374798   | 6    | AGTTCGCCTTAATCAACTCACTAAA | GGCCTCTACTCACCTGAAA    | HindIII |
| 10 | UW085174 | SSR          | scaffold000066 | 377830   | 6    | TCCAAAACAAGAGACGACCA      | AAGGGTGGGAGAAAAATGAA   |         |
| 11 | SSR06500 | SSR          | scaffold000066 | 414339   | 6    | TGACAAAACACTACCCACCG      | AGCAAATTCAACCGTTCATGT  |         |
| 12 | SSR01331 | SSR          | scaffold000066 | 699190   | 6    | CGGGATTTACCCCTCACATT      | GTGGGACCGAGAAGTTTGAT   |         |
